# Supplementary material
Source: PubMed Central journal article supplement (PMC2768816)
Supplement: NIHMS139511-supplement-01.pdf [file NIHMS139511-supplement-01.pdf]

# Supplemental Material

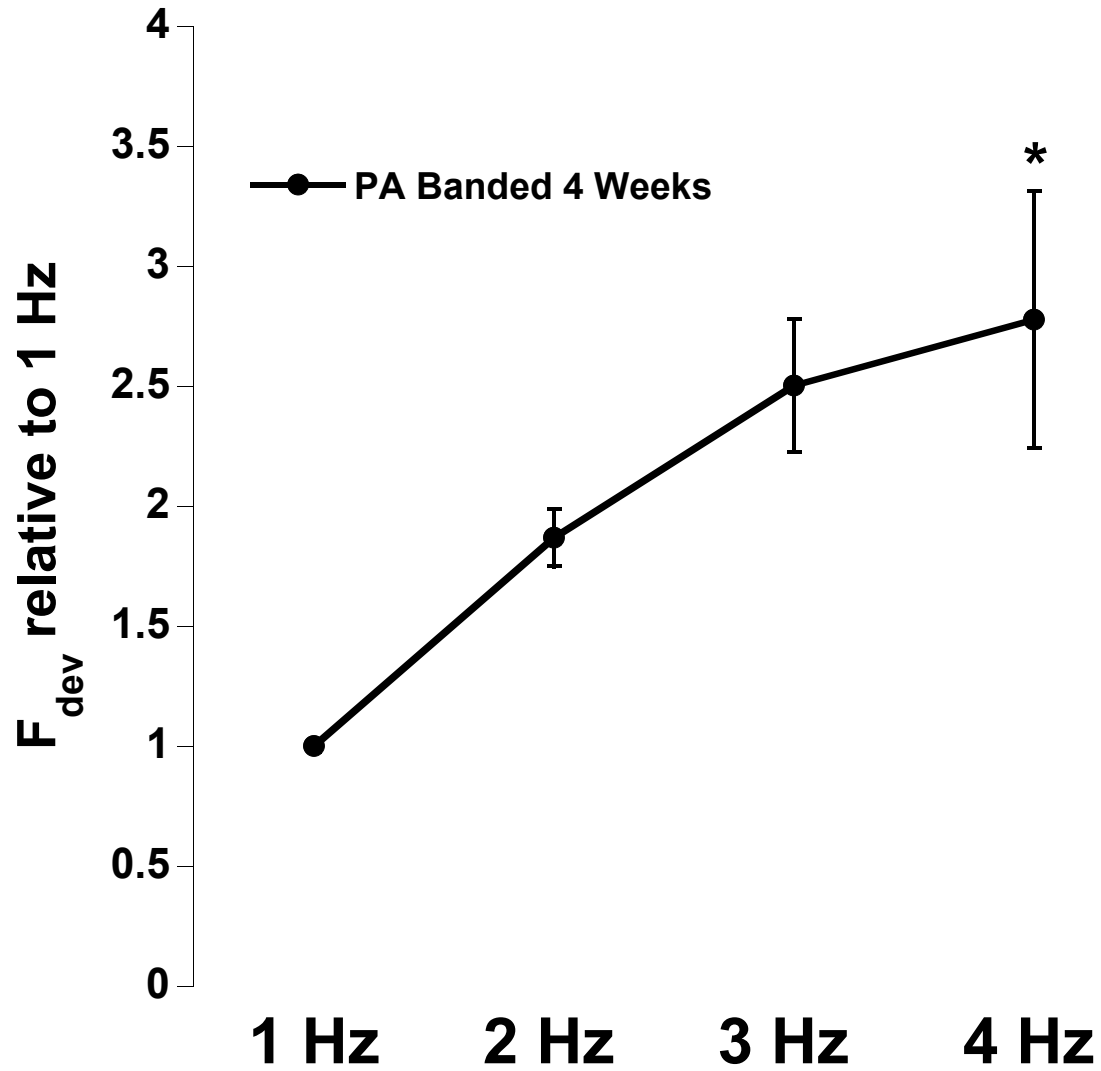

Figure 1 Supplemental: The average developed force normalized to 1 Hz for each frequency in trabeculae taken from PAB rabbits after 4 weeks of banding. The FFR was found to be positive through 4 Hz. \* Significantly different at 4 Hz compared to 1 Hz ( $p < 0.05$ ).
